# Supplementary material for: Highly luminescent phosphine oxide-containing bipolar alkynylgold(iii) complexes for solution-processable organic light-emitting devices with small efficiency roll-offs
Source: PubMed Central journal article supplement — Chem Sci. 2018 Jun 28;9(29):6228–32. doi: 10.1039/c8sc02265h (PMC6062897; doi:10.1039/c8sc02265h), 2018-06-28
Supplement: SC-009-C8SC02265H-s001.pdf [file SC-009-C8SC02265H-s001.pdf]

# **Highly Luminescent Phosphine Oxide-Containing Bipolar Alkynylgold(III) Complexes for Solution-Processable Organic Light-Emitting Devices with Small Efficiency Roll-Offs\*\***

*Chin-Ho Lee, Man-Chung Tang, Wai-Lung Cheung, Shiu-Lun Lai, Mei-Yee Chan, Vivian Wing-Wah Yam\**

[\*] Mr. C.-H. Lee, Dr. M.-C. Tang, Mr. W.-L. Cheung, Dr. S.-L. Lai, Dr. M.-Y. Chan, Prof. V. W.-W. Yam\*

Department of Chemistry, The University of Hong Kong, Pokfulam Road, Hong Kong, P. R. China.

Fax: +(852) 2857-1586; Tel: +(852) 2859-2153

E-mail: wwyam@hku.hk

**Electronic Supplementary Information**

|                                                        |    |
|--------------------------------------------------------|----|
| <b>Experimental Section</b> .....                      | 3  |
| <i>Materials and Reagents</i> .....                    | 3  |
| <i>Physical Measurements and Instrumentation</i> ..... | 3  |
| <i>OLED Fabrication and Characterization</i> .....     | 4  |
| <i>Synthesis and Characterization</i> .....            | 5  |
| <b>Figures and Tables</b> .....                        | 10 |
| <b>References</b> .....                                | 20 |

## Experimental Section

### *Materials and Reagents*

Tetra-*n*-butylammonium hexafluorophosphate (Aldrich, 98 %) was recrystallized for more than three times from hot absolute ethanol before use. Triethylamine was distilled over calcium hydride before use.  $\text{tBuC}^{\text{N}}(\text{C}_6\text{H}_4\text{Br})^{\text{C}}\text{tBu}$  was synthesized by Kröhnke Cyclization.<sup>1</sup> The alkynes were synthesized according to literature method.<sup>2</sup> All other reagents were of analytical grade and were used as received. All reactions were performed under anaerobic conditions using standard Schlenk techniques under nitrogen atmosphere unless specified otherwise.

### *Physical Measurements and Instrumentation*

Electronic absorption spectra were obtained by using a Cary 60 UV-visible spectrophotometer (Agilent technology) equipped with a xenon flash lamp.  $^1\text{H}$ ,  $^{13}\text{C}\{^1\text{H}\}$ ,  $^{31}\text{P}\{^1\text{H}\}$  NMR spectra were recorded on a Bruker AVANCE 400, 500 or 600 (400 MHz, 500 MHz and 600 MHz for  $^1\text{H}$  respectively; 100 MHz, 125 MHz and 150 MHz for  $^{13}\text{C}$  respectively; 162 MHz and 202 MHz for  $^{31}\text{P}$  respectively) Fourier-transform nuclear magnetic resonance (NMR) spectrometers with chemical shifts reported relative to tetramethylsilane, with the residual NMR solvent peak used as internal reference ( $\delta$  7.26 ppm for chloroform,  $\delta$  5.32 ppm for dichloromethane,  $\delta$  1.72 or  $\delta$  3.58 ppm for tetrahydrofuran). Splitting of the  $^{13}\text{C}$  signal due to  $^{31}\text{P}$ - $^{13}\text{C}$  coupling was not determined; instead all of them were reported as individual singlet peaks. Positive electron-impact (EI) mass spectra were recorded on a Thermo Scientific DFS High Resolution Magnetic Sector Mass Spectrometer. Positive matrix assisted laser desorption ionization (MALDI) spectra were recorded on Bruker ultraXtreme using dithranol matrix. High-resolution electrospray ionization (ESI) mass spectra were recorded on a Bruker maXis II High Resolution LC-QTOF Mass Spectrometer. IR spectra were recorded as KBr disk on a Bio-Rad FTS-7 FTIR spectrometer (4000–400  $\text{cm}^{-1}$ ). Elemental analyses for the metal complexes were performed on the Carlo Erba 1106 elemental analyzer at the Institute of Chemistry, Chinese Academy of Sciences in Beijing. Steady-state excitation and emission spectra were recorded on a Spex Fluorolog-3 model FL3-211 fluorescence spectrofluorometer equipped with a Hamamatsu R2658P photomultiplier tube (PMT) detector or

a Horiba Fluoromax-4 fluorescence spectrofluorometer equipped with a R928P PMT detector. Solid-state photophysical measurements were carried out with the solid sample loaded in a quartz tube inside a quartz-walled Dewar flask. Liquid nitrogen was placed into the optical Dewar flask for low temperature (77 K) photophysical measurements. Excited-state lifetimes of solution, solid and glass samples, in the microsecond regime, were measured using a conventional laser system. The excitation source used was the 355-nm output (third harmonic, 8 ns) of a Spectra-Physics Quanta-Ray Q-switched GCR-150 pulsed Nd:YAG laser (10 Hz). Luminescence decay signals were detected by a Hamamatsu R928 photomultiplier tube, recorded on a Tektronix Model TDS-620A (500 MHz, 2 GS s<sup>-1</sup>) digital oscilloscope, and analyzed by using a program for exponential fits. The excited-state lifetimes in solution state, in the nanosecond regime, were measured with Edinburgh Instruments LP980 spectrometer, while the excited-state lifetimes of thin film samples were measured on a Hamamatsu C11367 Quantaaurus-Tau Compact Fluorescence Lifetime Spectrometer. Relative luminescence quantum yields were measured by the optical dilute method reported by Demas and Crosby.<sup>3</sup> A degassed solution of [Ru(bpy)<sub>3</sub>]Cl<sub>2</sub> in degassed acetonitrile ( $\Phi_{\text{lum}}=0.06$ , excitation wavelength at 436 nm) was used as the reference,<sup>3</sup> while absolute photoluminescence quantum yields (PLQYs) of the thin films were measured on a Hamamatsu C11347 Absolute PLQY Measurement System. E<sub>0-0</sub> energy was estimated from the intersection of the UV-visible absorption spectrum and the emission spectrum at cryogenic temperature. Cyclic voltammetric measurements were performed by using a CH Instruments, Inc. model CHI 620E electrochemical analyzer. All solutions for electrochemical measurements were purged with pre-purified argon gas prior to measurement. Thermal analyses were performed with the Q50 TGA (TA instruments), in which the decomposition temperature, T<sub>d</sub>, is defined as the temperature at which the sample shows a 5 % weight loss.

### ***OLED Fabrication and Characterization***

Solution-processable OLEDs with the configuration of indium-tin-oxide (ITO)/poly(ethylenedioxythiophene):poly(styrene sulfonic acid) (PEDOT:PSS; 70 nm)/emissive layer (60 nm)/tris(2,4,6-trimethyl-3-(pyridine-3-yl)phenyl)borane (3TPyMB; 5 nm)/1,3,5-tri[(3-pyridyl)-phen-3-yl]benzene (TmPyPB; 30 nm)/LiF (0.8 nm)/Al (100 nm) were fabricated, in which the emissive layer was formed by mixing gold(III) complex with *N,N'*-dicarbazolyl-3,5-

benzene (MCP) and 4,4',4''-tris(carbazol-9-yl)triphenylamine (TCTA) to prepare 1 mL solution in chloroform via a spin-coating technique. High-purity 3TPyMB, TmPyPB, MCP and TCTA (> 99.5 % HPLC) were purchased from Luminescence Technology Corp. and were used as received. Current density–voltage–luminance characteristics of devices were simultaneously measured by a programmable Keithley 2420 source meter and a PR-655 colorimeter. All the devices were measured under ambient conditions without encapsulation.

## Synthesis and Characterization

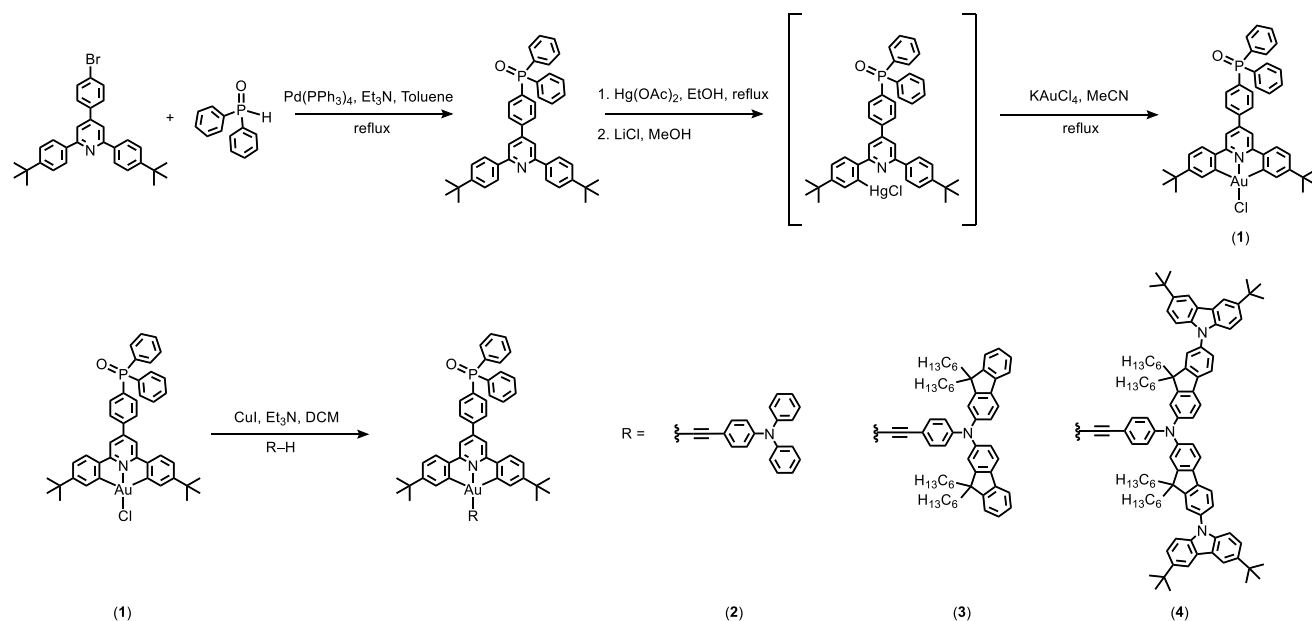

**Scheme S1.** Synthetic route of cyclometalating ligands and complexes **1–4**.

## Synthesis of cyclometalating ligand

A mixture of  $t\text{Bu}^{\wedge}\text{N}(\text{C}_6\text{H}_4\text{Br})^{\wedge}\text{C}^t\text{Bu}$  (2.00 g, 4.00 mmol) and diphenylphosphine oxide (0.77 g, 3.80 mmol) was degassed in a two-necked flask. Anhydrous degassed toluene (50 mL) was added.  $\text{Pd}(\text{PPh}_3)_4$  (0.44 g, 0.38 mmol) was added, followed by  $\text{Et}_3\text{N}$  (1.70 mL). The mixture was then refluxed. Upon completion of reaction, the mixture was concentrated. It was then purified by column chromatography to give a yellowish orange solid. The product was further recrystallized

from a solution of dichloromethane and diethyl ether to give  ${}^t\text{BuC}^{\wedge}\text{N}(\text{C}_6\text{H}_4\text{P}(\text{O})\text{Ph}_2)^{\wedge}\text{C}^t\text{Bu}$  as a white solid (70 %).

${}^t\text{BuC}^{\wedge}\text{N}(\text{C}_6\text{H}_4\text{P}(\text{O})\text{Ph}_2)^{\wedge}\text{C}^t\text{Bu}$ : Yield: 70 %.  ${}^1\text{H}$  NMR (400 MHz, chloroform-*d*,  $\delta$ / ppm):  $\delta$  8.15–8.10 (d,  $J = 8.5$  Hz, 4H), 7.89–7.82 (m, 6H), 7.77–7.70 (m, 4H), 7.62–7.47 (m, 10H), 1.39 (s, 18H);  ${}^{13}\text{C}\{^1\text{H}\}$  NMR (100 MHz, chloroform-*d*,  $\delta$ / ppm):  $\delta$  157.76, 152.58, 149.01, 142.81, 138.25, 136.56, 133.07, 132.96, 132.29, 132.25, 132.24, 132.19, 132.00, 128.82, 128.69, 127.49, 127.36, 127.03, 125.82, 116.76, 34.86, 31.45;  ${}^{31}\text{P}\{^1\text{H}\}$  NMR (162 MHz, chloroform-*d*,  $\delta$ / ppm):  $\delta$  28.69; MS (positive EI):  $m/z$  619.2 [ $\text{M}^+$ ]; HRMS (positive EI): calcd for  $\text{C}_{43}\text{H}_{42}\text{NOP}$  [ $\text{M}^+$ ]:  $m/z$  619.2999, found  $m/z$  619.3002.

### ***Synthesis of chlorogold(III) complexes (1)***

Chlorogold(III) complexes were synthesized by a modification of the literature method.<sup>4</sup> A mixture of  ${}^t\text{BuC}^{\wedge}\text{N}(\text{C}_6\text{H}_4\text{POPh}_2)^{\wedge}\text{C}^t\text{Bu}$  (1 g, 1.60 mmol) and  $\text{Hg}(\text{OAc})_2$  (561 mg, 1.76 mmol) was refluxed in EtOH (20 mL) overnight. Then it was cooled to room temperature and LiCl (68 mg, 1.60 mmol, dissolved in 5 mL MeOH) was added to the mixture. The mixture was then stirred at room temperature for 30 minutes. After adding chloroform, the mixture was washed with brine and dried over anhydrous  $\text{MgSO}_4$ . It was then filtered and concentrated. The mixture was purified by passing it through a short silica gel column with ethyl acetate as eluent. The concentrated mixture was used directly for the next step. The mixture was combined with  $\text{KAuCl}_4$  (0.68 g, 1.80 mmol) in another round-bottomed flask and were refluxed in acetonitrile (20 mL) solution overnight. Then it was cooled down and filtered to give a yellow solid. The yellow solid was dissolved in dichloromethane and eluted through a small silica gel pad with ethyl acetate. The eluent was concentrated to give the desired product **1** as a yellow solid (53 %).

$[\text{Au}\{{}^t\text{BuC}^{\wedge}\text{N}(\text{C}_6\text{H}_4\text{P}(\text{O})\text{Ph}_2)^{\wedge}\text{C}^t\text{Bu}\}\text{Cl}]$  (**1**): Yield: 53 %. Pale yellow solid.  ${}^1\text{H}$  NMR (600 MHz, dichloromethane-*d*<sub>2</sub>,  $\delta$ / ppm):  $\delta$  7.89–7.85 (m, 4H,  $\text{O}=\text{P}-\text{C}_6\text{H}_4-$ ), 7.84 (d,  $J = 2.0$  Hz, 2H,  $-\text{C}_6\text{H}_3-$  of the  $\text{C}^{\wedge}\text{N}^{\wedge}\text{C}$ ), 7.74–7.69 (m, 4H,  $-\text{C}_6\text{H}_5$  of phosphine oxide), 7.62 (td,  $J = 7.6$  Hz, 1.4 Hz, 2H,  $-\text{C}_6\text{H}_5$  of phosphine oxide), 7.54 (td,  $J = 7.6$  Hz, 2.8 Hz, 4H,  $-\text{C}_6\text{H}_5$  of phosphine oxide), 7.45 (s,

2H,  $-\text{C}_5\text{H}_2\text{N}-$  of  $\text{C}^{\wedge}\text{N}^{\wedge}\text{C}$ ), 7.40 (d,  $J = 8.1$  Hz, 2H,  $-\text{C}_6\text{H}_3-$  of the  $\text{C}^{\wedge}\text{N}^{\wedge}\text{C}$ ), 7.22 (dd,  $J = 8.1$  Hz, 2.0 Hz, 2H,  $-\text{C}_6\text{H}_3-$  of the  $\text{C}^{\wedge}\text{N}^{\wedge}\text{C}$ ), 1.33 (s, 18H,  $-\text{tBu}$ );  $^{13}\text{C}\{^1\text{H}\}$  NMR (150 MHz, dichloromethane- $d_2$ ,  $\delta$ / ppm):  $\delta$  170.90, 165.39, 156.09, 154.90, 145.45, 140.90, 136.28, 135.61, 133.41, 133.34, 133.28, 132.76, 132.75, 132.56, 132.49, 130.88, 129.28, 129.20, 128.26, 128.18, 125.59, 124.74, 115.28, 36.00, 31.47;  $^{31}\text{P}\{^1\text{H}\}$  NMR (162 MHz, dichloromethane- $d_2$ ,  $\delta$ / ppm):  $\delta$  27.08; HRMS (positive ESI): Found:  $m/z$  850.2279  $[\text{M}+\text{H}]^+$ . Calcd for  $\text{C}_{43}\text{H}_{41}\text{NOPAuCl}$ :  $m/z$  850.2274; Elemental analyses: Found (%): C 59.68, H 4.59, N 1.83. Calcd for  $\text{C}_{43}\text{H}_{40}\text{NOPAuCl}\cdot\text{H}_2\text{O}$ : C 59.49, H 4.88, N 1.61; IR (KBr):  $1121\text{ cm}^{-1}$   $\nu(\text{P}=\text{O})$ .

### General synthetic procedure for the synthesis of alkynylgold(III) complexes (2–4)

To a 2-necked flask was charged with  $[\text{Au}\{\text{tBuC}^{\wedge}\text{N}(\text{C}_6\text{H}_4\text{P}(\text{O})\text{Ph}_2)^{\wedge}\text{C}^{\wedge}\text{tBu}\}\text{Cl}]$  (1 equiv.), alkynyl ligand (1.05 equiv.) and CuI (0.05 equiv.). The reaction mixture was degassed and then anhydrous degassed dichloromethane (50 mL/mmol chlorogold(III) compound) was added, followed by the addition of anhydrous degassed  $\text{Et}_3\text{N}$  (10 mL/mmol chlorogold(III) compound). The mixture was stirred at room temperature overnight. Then it was concentrated and purified by column chromatography to afford the target complexes.

$[\text{Au}\{\text{tBuC}^{\wedge}\text{N}(\text{C}_6\text{H}_4\text{P}(\text{O})\text{Ph}_2)^{\wedge}\text{C}^{\wedge}\text{tBu}\}(\text{C}\equiv\text{C}-\text{C}_6\text{H}_4-\text{NPh}_2)]$  (**2**): Yield: 90 %. Yellow solid.  $^1\text{H}$  NMR (600 MHz, dichloromethane- $d_2$ ,  $\delta$ / ppm):  $\delta$  8.15 (d,  $J = 2.1$  Hz, 2H,  $-\text{C}_6\text{H}_3-$  of  $\text{C}^{\wedge}\text{N}^{\wedge}\text{C}$ ), 7.90–7.83 (m, 4H,  $\text{O}=\text{P}-\text{C}_6\text{H}_4-$ ), 7.71–7.69 (m, 2H,  $-\text{C}_6\text{H}_5$  of phosphine oxide), 7.69–7.67 (m, 2H,  $-\text{C}_6\text{H}_5$  of phosphine oxide), 7.62–7.58 (m, 2H,  $-\text{C}_6\text{H}_5$  of phosphine oxide), 7.57–7.55 (m, 4H,  $-\text{C}_6\text{H}_3-$  and  $-\text{C}_5\text{H}_2\text{N}-$  of  $\text{C}^{\wedge}\text{N}^{\wedge}\text{C}$ ), 7.53–7.49 (m, 4H,  $-\text{C}_6\text{H}_5$  of phosphine oxide), 7.44 (d,  $J = 8.6$  Hz, 2H,  $-\text{C}\equiv\text{C}-\text{C}_6\text{H}_4-$ ), 7.32–7.27 (m, 6H,  $-\text{C}_6\text{H}_5$  of triphenylamine and  $-\text{C}_6\text{H}_3-$  of  $\text{C}^{\wedge}\text{N}^{\wedge}\text{C}$ ), 7.12 (d,  $J = 7.3$  Hz, 4H,  $-\text{C}_6\text{H}_5$  of triphenylamine), 7.06 (t,  $J = 7.3$  Hz, 2H,  $-\text{C}_6\text{H}_5$  of triphenylamine), 6.99 (d,  $J = 8.6$  Hz, 2H,  $-\text{C}\equiv\text{C}-\text{C}_6\text{H}_4-$ ), 1.37 (s, 18H,  $-\text{tBu}$ );  $^{13}\text{C}\{^1\text{H}\}$  NMR (150 MHz, dichloromethane- $d_2$ ,  $\delta$ / ppm):  $\delta$  167.61, 165.50, 155.87, 154.46, 148.10, 147.36, 146.89, 141.59, 136.02, 135.35, 133.87, 133.41, 133.34, 133.28, 132.71, 132.53, 132.47, 129.87, 129.26, 129.18, 128.18, 128.10, 125.59, 125.22, 124.37, 123.70, 123.42, 120.79, 115.26, 101.69, 92.10, 35.83, 31.52;  $^{31}\text{P}\{^1\text{H}\}$

NMR (162 MHz, dichloromethane- $d_2$ ,  $\delta$ / ppm):  $\delta$  26.82; MS (positive MALDI):  $m/z$  1083.395 [M+H]<sup>+</sup>; Elemental analyses: Found (%): C 69.06, H 5.11, N 2.52. Calcd for C<sub>63</sub>H<sub>54</sub>N<sub>2</sub>OPAu•0.5H<sub>2</sub>O: C 69.29, H 5.08, N 2.57; IR (KBr): 1121 cm<sup>-1</sup>  $\nu$ (P=O), 2146 cm<sup>-1</sup>  $\nu$ (C≡C).

[Au{<sup>t</sup>BuC<sup>N</sup>(C<sub>6</sub>H<sub>4</sub>P(O)Ph<sub>2</sub>)<sup>C</sup>Bu} {C≡C–C<sub>6</sub>H<sub>4</sub>–N(C<sub>13</sub>H<sub>7</sub>(C<sub>6</sub>H<sub>13</sub>)<sub>2</sub>)}] (**3**): Yield: 80 %. Orange solid. <sup>1</sup>H NMR (600 MHz, tetrahydrofuran- $d_8$ ,  $\delta$ / ppm):  $\delta$  8.23 (d,  $J$  = 2.2 Hz, 2H, –C<sub>6</sub>H<sub>3</sub>– of C<sup>N</sup>C), 8.05 (dd,  $J$  = 8.2 Hz, 2.2 Hz, 2H, O=P–C<sub>6</sub>H<sub>4</sub>–), 7.94–7.88 (m, 4H, –C<sub>5</sub>H<sub>2</sub>N– of C<sup>N</sup>C and O=P–C<sub>6</sub>H<sub>4</sub>–), 7.78–7.72 (m, 6H, –C<sub>6</sub>H<sub>5</sub> of phosphine oxide and –C<sub>6</sub>H<sub>3</sub>– of C<sup>N</sup>C), 7.66 (d,  $J$  = 7.4 Hz, 2H, –C<sub>13</sub>H<sub>7</sub>(C<sub>6</sub>H<sub>13</sub>)<sub>2</sub>–), 7.64 (d,  $J$  = 8.2 Hz, 2H, –C≡C–C<sub>6</sub>H<sub>4</sub>–), 7.57 (td,  $J$  = 7.5 Hz, 1.4 Hz, 2H, –C<sub>6</sub>H<sub>5</sub> of phosphine oxide), 7.50 (td,  $J$  = 7.5 Hz, 2.7 Hz, 4H, –C<sub>6</sub>H<sub>5</sub> of phosphine oxide), 7.45 (d,  $J$  = 8.7 Hz, 2H, –C<sub>13</sub>H<sub>7</sub>(C<sub>6</sub>H<sub>13</sub>)<sub>2</sub>–), 7.34 (d,  $J$  = 7.4 Hz, 2H, –C<sub>13</sub>H<sub>7</sub>(C<sub>6</sub>H<sub>13</sub>)<sub>2</sub>–), 7.31–7.25 (m, 6H, –C<sub>6</sub>H<sub>3</sub>– of C<sup>N</sup>C and –C<sub>13</sub>H<sub>7</sub>(C<sub>6</sub>H<sub>13</sub>)<sub>2</sub>–), 7.22 (t,  $J$  = 7.4 Hz, 2H, –C<sub>13</sub>H<sub>7</sub>(C<sub>6</sub>H<sub>13</sub>)<sub>2</sub>–), 7.11–7.06 (m, 4H, –C≡C–C<sub>6</sub>H<sub>4</sub>– and –C<sub>13</sub>H<sub>7</sub>(C<sub>6</sub>H<sub>13</sub>)<sub>2</sub>–), 1.99–1.90 (m, 8H, –CH<sub>2</sub>– and –CH<sub>3</sub>), 1.38 (s, 18H, –<sup>t</sup>Bu), 1.21–1.07 (m, 24H, –CH<sub>2</sub>–), 0.84–0.61 (m, 20H, –CH<sub>2</sub>– and –CH<sub>3</sub>); <sup>13</sup>C{<sup>1</sup>H} NMR (150 MHz, tetrahydrofuran- $d_8$ ,  $\delta$ / ppm):  $\delta$  168.48, 166.20, 155.47, 155.16, 152.93, 151.37, 148.00, 147.84, 147.74, 142.11, 141.80, 137.64, 137.34, 136.68, 135.01, 134.33, 134.30, 133.65, 133.58, 133.46, 132.93, 132.87, 132.68, 132.66, 129.42, 129.34, 128.63, 128.55, 127.70, 127.22, 126.13, 124.41, 123.71, 123.50, 122.15, 121.35, 120.01, 119.94, 115.67, 101.37, 93.24, 55.98, 41.19, 36.05, 32.63, 31.70, 30.71, 24.82, 23.50, 14.54; <sup>31</sup>P{<sup>1</sup>H} NMR (162 MHz, tetrahydrofuran- $d_8$ ,  $\delta$ / ppm):  $\delta$  23.61; MS (positive MALDI):  $m/z$  1594.814 [M+H]<sup>+</sup>; Elemental analyses: Found (%): C 75.37, H 7.10, N 1.94. Calcd for C<sub>101</sub>H<sub>110</sub>N<sub>2</sub>OPAu•0.5H<sub>2</sub>O: C 75.59, H 7.10, N 1.94; IR (KBr): 1121 cm<sup>-1</sup>  $\nu$ (P=O), 2146 cm<sup>-1</sup>  $\nu$ (C≡C).

[Au{<sup>t</sup>BuC<sup>N</sup>(C<sub>6</sub>H<sub>4</sub>P(O)Ph<sub>2</sub>)<sup>C</sup>Bu} {C≡C–C<sub>6</sub>H<sub>4</sub>–N(C<sub>13</sub>H<sub>6</sub>(C<sub>6</sub>H<sub>13</sub>)<sub>2</sub>–(<sup>t</sup>BuCbz))<sub>2</sub>}] (**4**): Yield: 77 %. Orange solid. <sup>1</sup>H NMR (500 MHz, dichloromethane- $d_2$ ,  $\delta$ / ppm):  $\delta$  8.22 (d,  $J$  = 2.0 Hz, 2H, –C<sub>6</sub>H<sub>3</sub>– of C<sup>N</sup>C), 8.18 (d,  $J$  = 1.9 Hz, 4H, –C<sub>12</sub>H<sub>6</sub>N–), 7.90–7.85 (m, 6H, –C<sub>13</sub>H<sub>7</sub>(C<sub>6</sub>H<sub>13</sub>)<sub>2</sub>–, O=P–C<sub>6</sub>H<sub>4</sub>– and –C<sub>5</sub>H<sub>2</sub>N– of C<sup>N</sup>C), 7.73–7.69 (m, 6H, –C<sub>13</sub>H<sub>7</sub>(C<sub>6</sub>H<sub>13</sub>)<sub>2</sub>– and –C<sub>6</sub>H<sub>5</sub> of phosphine oxide), 7.64–7.59 (m, 6H, –C<sub>6</sub>H<sub>5</sub> of phosphine oxide and –C<sub>6</sub>H<sub>3</sub>– of C<sup>N</sup>C), 7.55–7.49 (m, 14H,



$-\text{C}_{12}\text{H}_6\text{N}-$ ,  $-\text{C}\equiv\text{C}-\text{C}_6\text{H}_4-$ ,  $\text{O}=\text{P}-\text{C}_6\text{H}_4-$  and  $-\text{C}_6\text{H}_5$  of phosphine oxide), 7.41 (d,  $J = 8.7$  Hz, 4H,  $-\text{C}_{12}\text{H}_6\text{N}-$ ), 7.36–7.32 (m, 4H,  $-\text{C}_{13}\text{H}_7(\text{C}_6\text{H}_{13})_2-$  and  $-\text{C}_6\text{H}_3-$  of  $\text{C}^{\wedge}\text{N}^{\wedge}\text{C}$ ), 7.18 (d,  $J = 9.4$  Hz, 4H,  $-\text{C}_{13}\text{H}_7(\text{C}_6\text{H}_{13})_2-$  and  $-\text{C}\equiv\text{C}-\text{C}_6\text{H}_4-$ ), 2.03–1.91 (m, 8H,  $-\text{CH}_2-$ ), 1.48 (s, 36H,  $-\text{tBu}$  of carbazole), 1.40 (s, 18H,  $-\text{tBu}$  of  $\text{C}^{\wedge}\text{N}^{\wedge}\text{C}$ ), 1.24–1.13 (m, 24H,  $-\text{CH}_2-$ ), 0.87–0.77 (m, 20H,  $-\text{CH}_2-$  and  $-\text{CH}_3$ );  $^{13}\text{C}\{^1\text{H}\}$  NMR (125 MHz, dichloromethane- $d_2$ ,  $\delta$ / ppm):  $\delta$  167.71, 165.64, 156.01, 154.53, 153.15, 153.02, 147.66, 147.59, 146.97, 143.40, 141.63, 140.48, 140.00, 136.79, 136.48, 133.96, 133.49, 133.41, 132.76, 132.74, 132.66, 132.59, 132.51, 129.30, 129.21, 128.15, 128.05, 125.93, 125.63, 124.48, 124.34, 124.21, 123.79, 123.40, 121.97, 121.15, 120.88, 120.65, 119.86, 116.84, 115.26, 109.87, 101.81, 92.33, 56.04, 40.81, 35.89, 35.22, 32.35, 32.27, 31.56, 30.26, 24.61, 23.17, 14.50;  $^{31}\text{P}\{^1\text{H}\}$  NMR (202 MHz, dichloromethane- $d_2$ ,  $\delta$ / ppm):  $\delta$  26.80; MS (positive MALDI):  $m/z$  2150.176  $[\text{M}+\text{H}]^+$ ; Elemental analyses: Found (%): C 78.04, H 7.35, N 2.60. Calcd for  $\text{C}_{141}\text{H}_{156}\text{N}_4\text{OPAu}\cdot\text{H}_2\text{O}$ : C 78.09, H 7.34, N 2.58; IR (KBr): 1118  $\text{cm}^{-1}$   $\nu(\text{P}=\text{O})$ , 2145  $\text{cm}^{-1}$   $\nu(\text{C}\equiv\text{C})$ .

## Figures and Tables

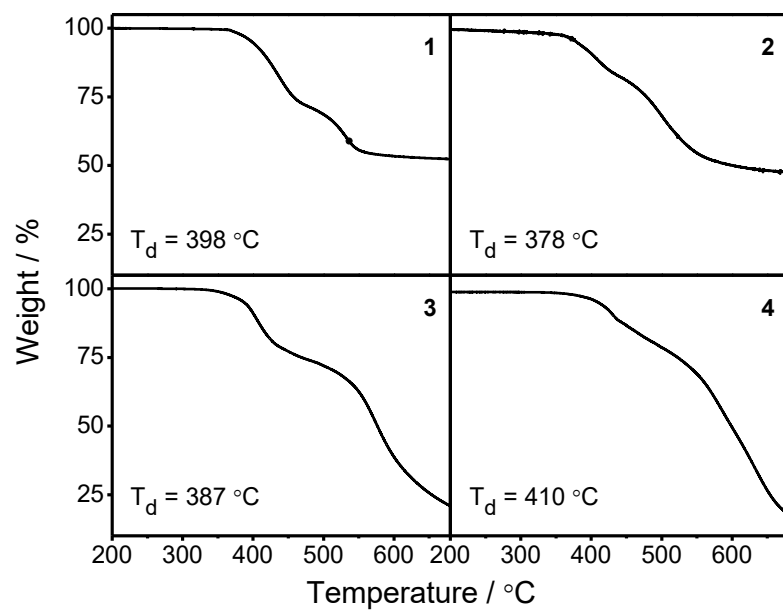

**Figure S1.** Thermogravimetric analysis (TGA) traces of complexes 1–4.

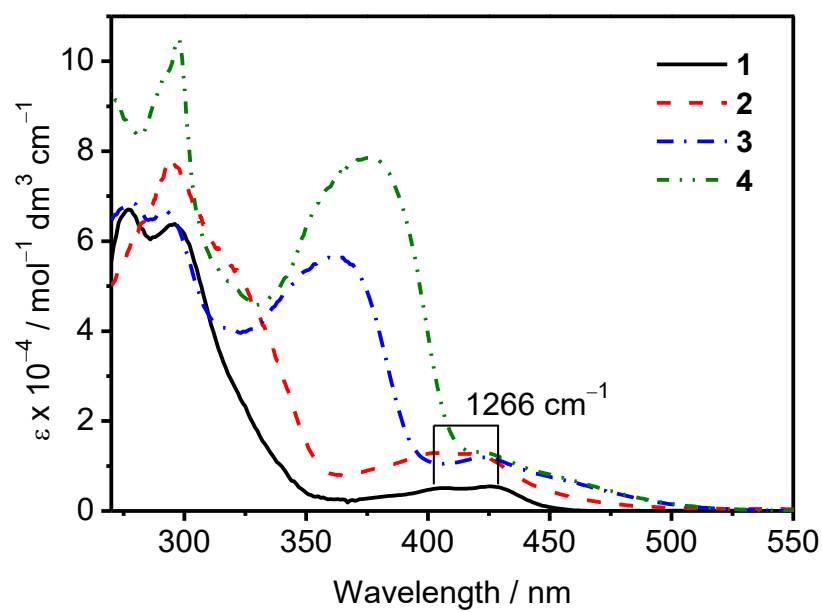

**Figure S2.** UV-Visible spectra for complexes 1–4 in dichloromethane solution at 298 K.

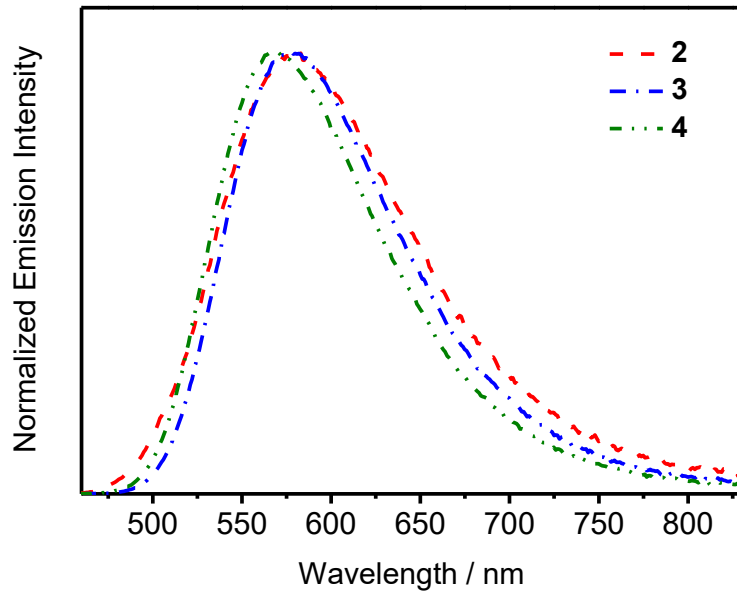

**Figure S3.** Emission spectra for complexes **2–4** in degassed toluene solution at 298 K.

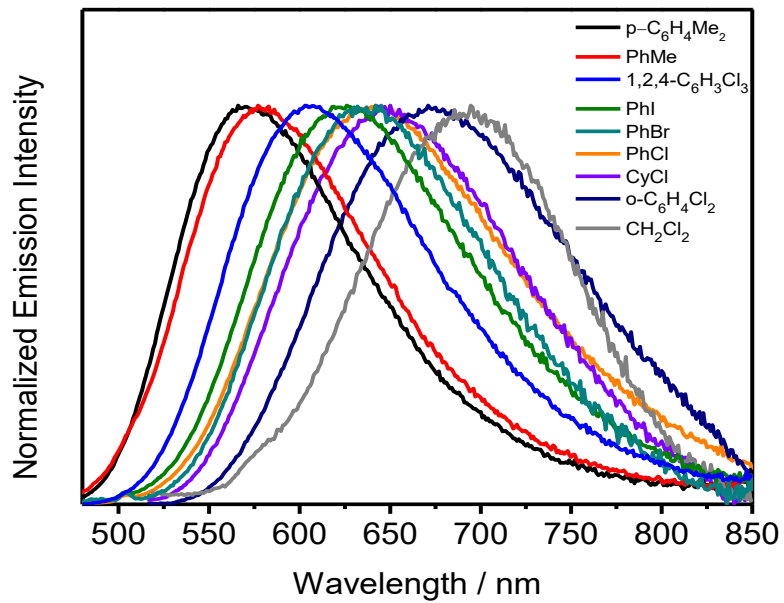

**Figure S4.** Solvent-dependent emission spectra of complex **2** at 298 K.

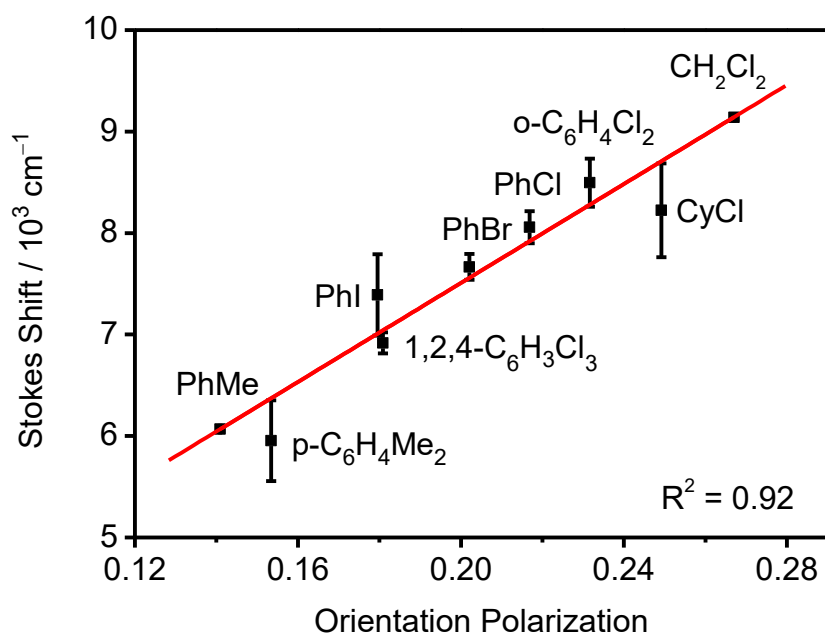

**Figure S5.** Lippert-Mataga plot for complex **2** at 298K.

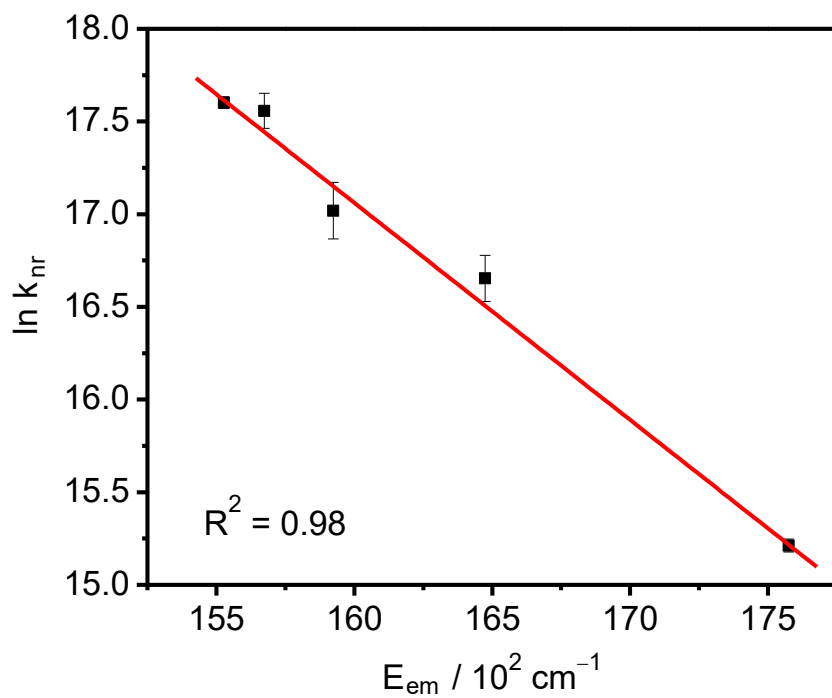

**Figure S6.** Plot of  $\ln k_{nr}$  vs.  $E_{em}$  of complex **2** at 298 K.

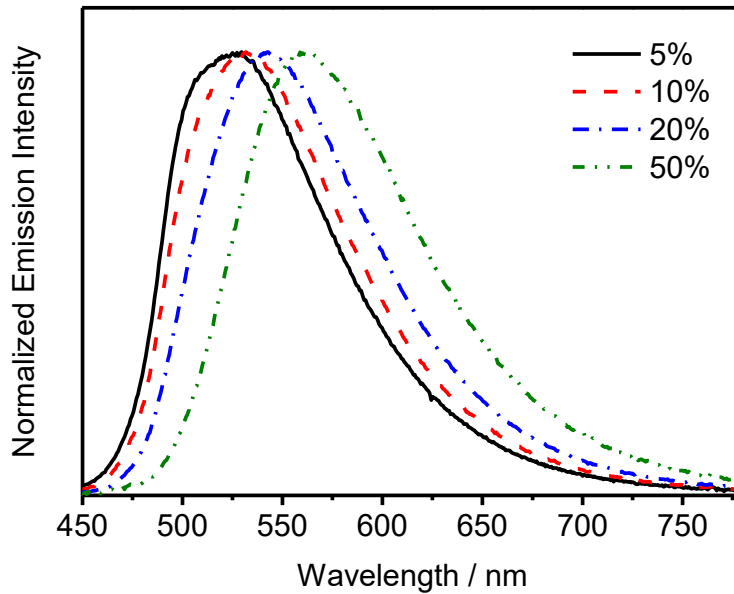

**Figure S7.** Concentration-dependent thin-film emission spectra of complex **2** doped in MCP:TCTA (w/w = 3:1) at 298 K.

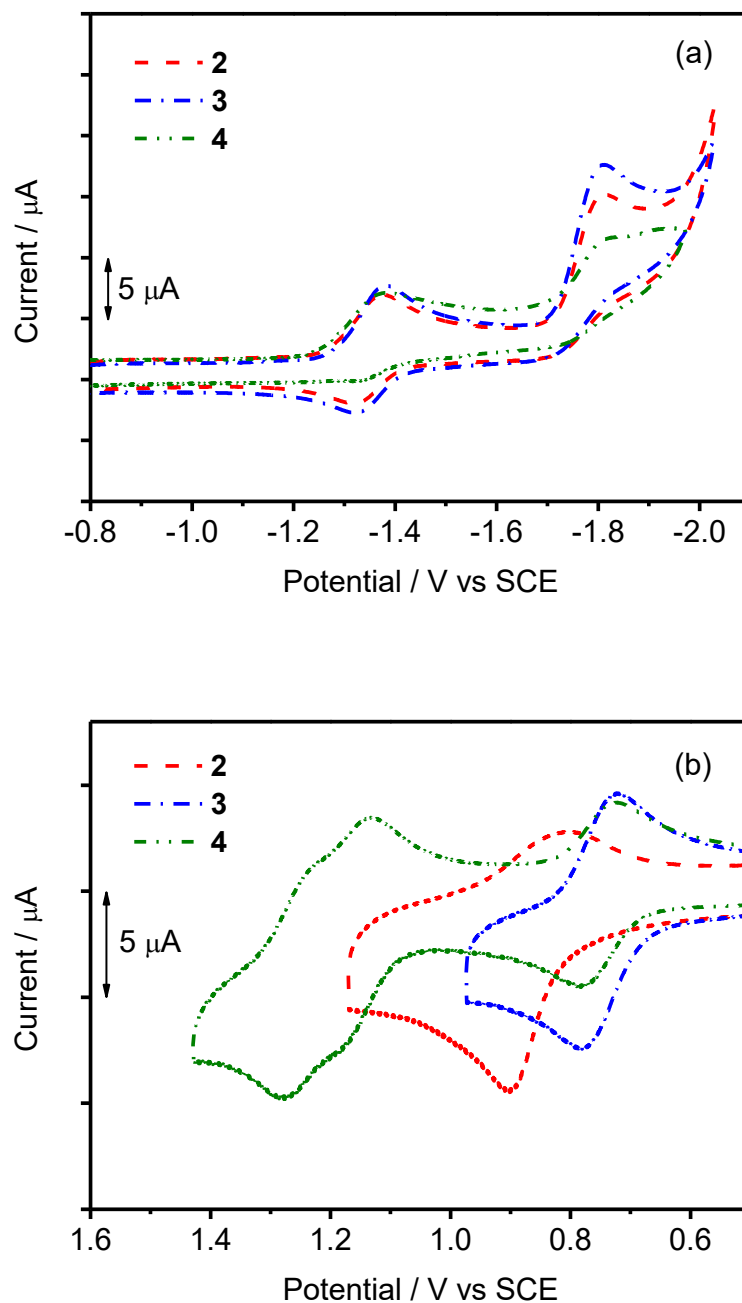

**Figure S8.** Cyclic voltamograms for the (a) reduction scan and (b) oxidation scan of complexes 2–4 in dichloromethane (0.1 M  $n\text{BuN}_4\text{PF}_6$ ).

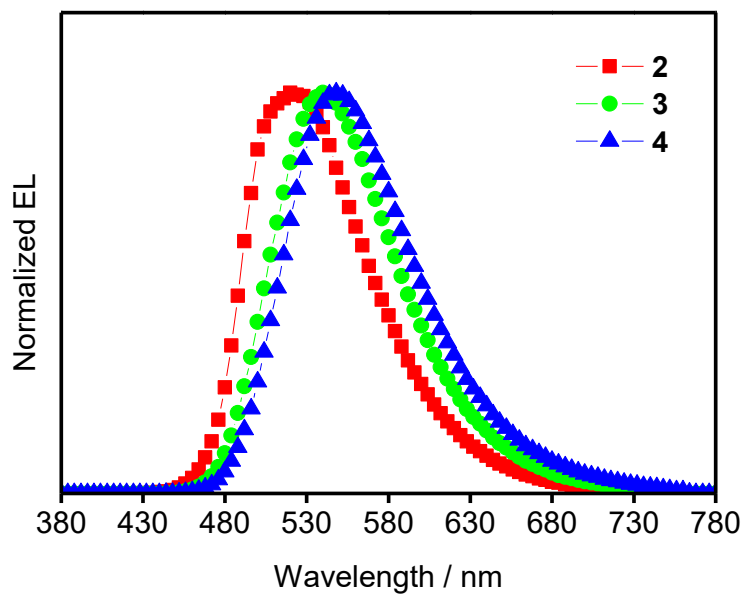

**Figure S9.** Normalized EL spectra of devices doped with 20 wt% complexes **2–4**.

**Table S1.** Photophysical properties of complexes **1–5**

| Complex                       | Absorption<br>$\lambda_{\max} / \text{nm}$ ( $\epsilon_{\max} / \text{dm}^3 \text{mol}^{-1} \text{cm}^{-1}$ ) | Medium (Temperature / K)                               | Emission<br>$\lambda_{\max} / \text{nm}$ ( $\tau_0 / \mu\text{s}$ ) [ $\tau_0 / \text{ns}$ ] | $\Phi_{\text{PL}}$<br>(soln) <sup>a</sup> | $\Phi_{\text{PL}}$<br>(film) <sup>b</sup> |
|-------------------------------|---------------------------------------------------------------------------------------------------------------|--------------------------------------------------------|----------------------------------------------------------------------------------------------|-------------------------------------------|-------------------------------------------|
| <b>1</b>                      | 277 (67105), 297 (63370),<br>404 (5130), 425 (5800)                                                           | CH <sub>2</sub> Cl <sub>2</sub> (298)                  | Non-emissive                                                                                 | --                                        | --                                        |
|                               |                                                                                                               | Glass (77) <sup>c,d</sup><br>Solid (298)<br>Solid (77) | 491, 515, 553, 602 sh (230)<br>Non-emissive<br>517, 554, 601 sh (15)                         |                                           |                                           |
| <b>2</b>                      | 296 (76550), 320 sh (55220), 403<br>(12970), 422 (12175)<br>328 sh (23180), 400 (5620),<br>424 (5620)         | CH <sub>2</sub> Cl <sub>2</sub> (298)                  | 692 (< 0.1)                                                                                  | 1 × 10 <sup>-3</sup>                      |                                           |
|                               |                                                                                                               | Toluene (298)                                          | 580 (< 0.1)                                                                                  | 0.22                                      |                                           |
|                               |                                                                                                               | <i>p</i> -Xylene (298)                                 | 569 [198]                                                                                    | 0.20                                      |                                           |
|                               |                                                                                                               | Chlorobenzene (298)                                    | 644 [22]                                                                                     | 0.03                                      |                                           |
|                               |                                                                                                               | <i>o</i> -Dichlorobenzene (298)                        | 675 (< 0.1)                                                                                  | 0.01                                      |                                           |
|                               |                                                                                                               | 1,2,4-Trichlorobenzene (298)                           | 607 [55]                                                                                     | 0.06                                      |                                           |
|                               |                                                                                                               | Chlorocyclohexane (298)                                | 651 (< 0.1)                                                                                  | 0.01                                      |                                           |
|                               |                                                                                                               | Bromobenzene (298)                                     | 638 [23]                                                                                     | 0.03                                      |                                           |
|                               |                                                                                                               | Iodobenzene (298)                                      | 628 [39]                                                                                     | 0.04                                      |                                           |
|                               |                                                                                                               | Glass (77) <sup>c-e</sup>                              | 489, 510, 546, 599 sh<br>(62, 144)                                                           |                                           |                                           |
|                               |                                                                                                               | Solid (298)                                            | 595 (0.1)                                                                                    |                                           |                                           |
|                               |                                                                                                               | Solid (77)                                             | 574 (2.6)                                                                                    |                                           |                                           |
|                               |                                                                                                               | Thin Film (298)                                        |                                                                                              |                                           | 0.60                                      |
|                               |                                                                                                               | 5 % in MCP:TCTA <sup>f</sup>                           | 525 (9.9)                                                                                    |                                           | 0.62                                      |
| 10 % in MCP:TCTA <sup>f</sup> | 532 (7.2)                                                                                                     |                                                        | 0.60                                                                                         |                                           |                                           |
| 20 % in MCP:TCTA <sup>f</sup> | 542 (3.9)                                                                                                     |                                                        | 0.46                                                                                         |                                           |                                           |
| 50 % in MCP:TCTA <sup>f</sup> | 563 (0.7)                                                                                                     |                                                        |                                                                                              |                                           |                                           |



|                               |                                                                                                    |                                       |               |                    |
|-------------------------------|----------------------------------------------------------------------------------------------------|---------------------------------------|---------------|--------------------|
| 3                             | 278 (67870), 292 (66500),<br>363 (55660), 424 (12260)<br>362 (47730), 426 (8780),<br>460 sh (5270) | CH <sub>2</sub> Cl <sub>2</sub> (298) | 720 (< 0.1)   | 6×10 <sup>-2</sup> |
|                               |                                                                                                    | Toluene (298)                         | 580 (< 0.1)   | 0.37               |
|                               |                                                                                                    | Glass (77) <sup>d,e</sup>             | 552 (87, 382) |                    |
|                               |                                                                                                    | Solid (298)                           | 599 (0.1)     |                    |
|                               |                                                                                                    | Solid (77)                            | 586 (1.3)     |                    |
|                               |                                                                                                    | Thin Film (298)                       |               |                    |
|                               |                                                                                                    | 5 % in MCP:TCTA <sup>f</sup>          | 537 (5.7)     | 0.65               |
|                               |                                                                                                    | 10 % in MCP:TCTA <sup>f</sup>         | 545 (2.2)     | 0.74               |
|                               |                                                                                                    | 20 % in MCP:TCTA <sup>f</sup>         | 558 (0.9)     | 0.63               |
| 4                             | 297 (105310), 376 (79060),<br>426 sh (13080)<br>375 (73340), 428 (11240),<br>461 sh (6230)         | 50 % in MCP:TCTA <sup>f</sup>         | 579 (0.4)     | 0.55               |
|                               |                                                                                                    | CH <sub>2</sub> Cl <sub>2</sub> (298) | Non-emissive  |                    |
|                               |                                                                                                    | Toluene (298)                         | 566 (< 0.1)   | 0.48               |
|                               |                                                                                                    | Glass (77) <sup>d,e</sup>             | 556 (60, 283) |                    |
|                               |                                                                                                    | Solid (298)                           | 601 (0.2)     |                    |
|                               |                                                                                                    | Solid (77)                            | 591 (2.7)     |                    |
|                               |                                                                                                    | Thin Film (298)                       |               |                    |
|                               |                                                                                                    | 5 % in MCP:TCTA <sup>f</sup>          | 533 (3.9)     | 0.68               |
|                               |                                                                                                    | 10 % in MCP:TCTA <sup>f</sup>         | 542 (3.0)     | 0.70               |
| 20 % in MCP:TCTA <sup>f</sup> | 550 (1.4)                                                                                          | 0.72                                  |               |                    |
| 50 % in MCP:TCTA <sup>f</sup> | 566 (0.5)                                                                                          | 0.60                                  |               |                    |

<sup>a</sup> Relative luminescence quantum yield, measured at room temperature using degassed acetonitrile solution of [Ru(bpy)<sub>3</sub>]Cl<sub>2</sub> as reference (excitation wavelength = 436 nm, Φ<sub>lum</sub> = 0.06).

<sup>b</sup> Absolute luminescence quantum yield of thin films was measured with 350 nm excitation.

<sup>c</sup> Vibronic-structured emission band.

<sup>d</sup> Measured in EtOH-MeOH-CH<sub>2</sub>Cl<sub>2</sub> (40:10:1, v/v).

<sup>e</sup> Double-exponential decay.

<sup>f</sup> In MCP:TCTA (3:1, w/w).

**Table S2.** Electrochemical data for **2–4**<sup>a</sup>

| Compound | Oxidation<br>$E_{1/2}$ / V vs SCE <sup>b</sup><br>( $\Delta E_p$ / mV) | Reduction<br>$E_{1/2}$ / V vs SCE <sup>b</sup><br>[ $E_{pc}$ / V vs SCE <sup>c</sup> ]<br>( $\Delta E_p$ / mV) | $E_{\text{HOMO}}$ /<br>eV <sup>d</sup> | $E_{\text{LUMO}}$ /<br>eV <sup>d</sup> |
|----------|------------------------------------------------------------------------|----------------------------------------------------------------------------------------------------------------|----------------------------------------|----------------------------------------|
| <b>2</b> | +0.92 (87)                                                             | -1.35 (60), [-1.81]                                                                                            | -5.72                                  | -3.45                                  |
| <b>3</b> | +0.75 (63)                                                             | -1.35 (66), [-1.81]                                                                                            | -5.55                                  | -3.45                                  |
| <b>4</b> | +0.75 (61), +1.15 (63),<br>+1.25 (61)                                  | -1.35 (67), [-1.81]                                                                                            | -5.55                                  | -3.45                                  |

<sup>a</sup> Working electrode: glassy carbon, scan rate = 100 mV s<sup>-1</sup>

<sup>b</sup>  $E_{1/2} = (E_{pa} + E_{pc})/2$ ;  $E_{pa}$  and  $E_{pc}$  are the peak anodic and peak cathodic potentials respectively.

$$\Delta E_p = (E_{pa} - E_{pc}).$$

<sup>c</sup>  $E_{pc}$  refers to the cathodic peak potential for irreversible reductions.

<sup>d</sup>  $E_{\text{HOMO}}$  and  $E_{\text{LUMO}}$  were calculated from electrochemical potentials with the formula,

$$E_{\text{HOMO}} = -e(4.8 \text{ V} + E_{1/2}^{\text{ox}}); E_{\text{LUMO}} = -e(4.8 \text{ V} + E_{1/2}^{\text{red}}).$$

**Table S3.** Key parameters of devices based on **2–4** doped in MCP:TCTA (w/w = 3:1) at different concentrations

| Complex  | Dopant concentration / wt% | Max. current efficiency / $\text{cd A}^{-1}$ | Max. power efficiency / $\text{lm W}^{-1}$ | Max. EQE / % | $\lambda_{\text{max}} / \text{nm}^a$ |
|----------|----------------------------|----------------------------------------------|--------------------------------------------|--------------|--------------------------------------|
| <b>2</b> | 5                          | 33.5                                         | 19.1                                       | 10.2         | 520 (0.30, 0.58)                     |
|          | 10                         | 36.5                                         | 22.9                                       | 11.1         | 521 (0.31, 0.58)                     |
|          | 20                         | 51.6                                         | 35.9                                       | 15.3         | 540 (0.37, 0.58)                     |
|          | 50                         | 23.6                                         | 16.1                                       | 7.6          | 558 (0.44, 0.54)                     |
| <b>3</b> | 5                          | 49.2                                         | 39.0                                       | 14.3         | 541 (0.37, 0.58)                     |
|          | 10                         | 37.0                                         | 28.1                                       | 11.1         | 556 (0.40, 0.56)                     |
|          | 20                         | 33.6                                         | 25.5                                       | 10.6         | 563 (0.43, 0.55)                     |
|          | 50                         | 27.3                                         | 23.1                                       | 9.9          | 577 (0.49, 0.50)                     |
| <b>4</b> | 5                          | 21.0                                         | 14.4                                       | 6.2          | 547 (0.38, 0.56)                     |
|          | 10                         | 24.7                                         | 20.4                                       | 7.5          | 553 (0.39, 0.56)                     |
|          | 20                         | 32.0                                         | 27.5                                       | 9.8          | 557 (0.40, 0.56)                     |
|          | 50                         | 23.6                                         | 21.0                                       | 7.8          | 568 (0.46, 0.53)                     |

<sup>a</sup> CIE coordinates in parentheses, measured at  $100 \text{ cd m}^{-2}$ .

## References

1. F. Kröhnke, *Synthesis*, 1976, **1976**, 1.
2. C.-H. Lee, M.-C. Tang, Y.-C. Wong, M.-Y. Chan and V. W.-W. Yam, *J. Am. Chem. Soc.*, 2017, **139**, 10539.
3. G. A. Crosby and J. N. Demas, *J. Phys. Chem.*, 1971, **75**, 991.
4. (a) K. M.-C. Wong, X. Zhu, L.-L. Hung, N. Zhu, V. W.-W. Yam and H.-S. Kwok, *Chem. Commun.*, 2005, 2906; (b) K. M.-C. Wong, L.-L. Hung, W. H. Lam, N. Zhu and V. W.-W. Yam, *J. Am. Chem. Soc.*, 2007, **129**, 4350; (c) K.-H. Wong, K.-K. Cheung, M. C.-W. Chan and C.-M. Che, *Organometallics*, 1998, **17**, 3505.
